# Supplementary material for: Dip-coated carbon nanotube surface deposits as stable, effective response enhancers in pencil lead electrode voltammetry
Source: Royal Society of Chemistry journal article supplement (doi:10.1039/d3ra05688k), 2023-01-01
Supplement: d3ra05688k1.pdf [file d3ra05688k1.pdf]

## SUPPLEMENTARY INFORMATION

### Dip-coated carbon nanotube surface deposits as stable, effective response enhancers in pencil lead electrode voltammetry

Kamonwan Chatree and Albert Schulte\*

School of Biomolecular Science and Engineering (BSE), Vidyasirimedhi  
Institute of Science and Technology (VISTEC), Wang Chan Valley,  
Rayong 21210, Thailand  
E-MAIL: [albert.s@vistec.ac.th](mailto:albert.s@vistec.ac.th)

### Table of Contents

#### Supplementary Figures S1-S11 and Tables S1 and S2

- Figure S1:** Cyclic and differential pulse voltammograms of 100 mM ferricyanide at pencil lead electrodes that were made with pencil leads of the same brand and diameter (0.5 mm) but of 4H, 3H, 2H, H, F, HB, B, 2B, 3B and 4B hardness/softness grades.
- Figure S2:** Electrochemical impedance spectroscopy characterization of a Pentel AinSTEIN-based pencil lead electrode regarding the influence of the pencil lead hardness on the bare and CNT-modified sensor's ferricyanide redox responsiveness.
- Figure S3:** Evaluation of the influence of the number of dip/dry cycles that are performed during CNT modification of PLEs on the ferricyanide redox responsiveness of completed sensors.
- Figure S4:** Electrochemical impedance spectroscopy (EIS) evaluation of the influence of the number of dip/dry cycles that are performed during CNT modification of PLEs on the ferricyanide redox responsiveness of completed sensors.
- Figure S5:** Cyclic voltammograms (CVs) of 100 mM ferricyanide at pencil lead electrodes (PLEs) that were made with 0.5-mm-diameter HB pencil leads of 35 different brands
- Figure S6:** Differential pulse voltammograms (DPVs) of 100 mM ferricyanide at pencil lead electrodes (PLEs) that were made with 0.5-mm-diameter HB pencil leads of 35 different brands.
- Figure S7:** Triplicate repetitions of cyclic voltammograms of 100 mM ferricyanide at 11 different HB-PLEs without (blue) and with (red) CNT modification.
- Figure S8:** Triplicate repetitions of differential pulse voltammograms of 100 mM ferricyanide at 11 different HB-PLEs without (blue) and with (red) CNT modification.
- Figure S9:** Durability test I with 5 CNT-modified HB pencil lead electrodes.
- Figure S10:** Durability test II with 5 CNT-modified HB pencil lead electrodes.
- Figure S11:** Durability test III with 5 CNT-modified HB pencil lead electrodes.
- Table S1:** The specific conductivity of Pentel AinSTEIN pencil leads of different hardness/softness grades. (4H → HB → 4B)
- Table S2:** Carbon nanotube-based performance enhancement of stationary pencil lead electrodes (PLEs): A comparison of own with published accomplishments.

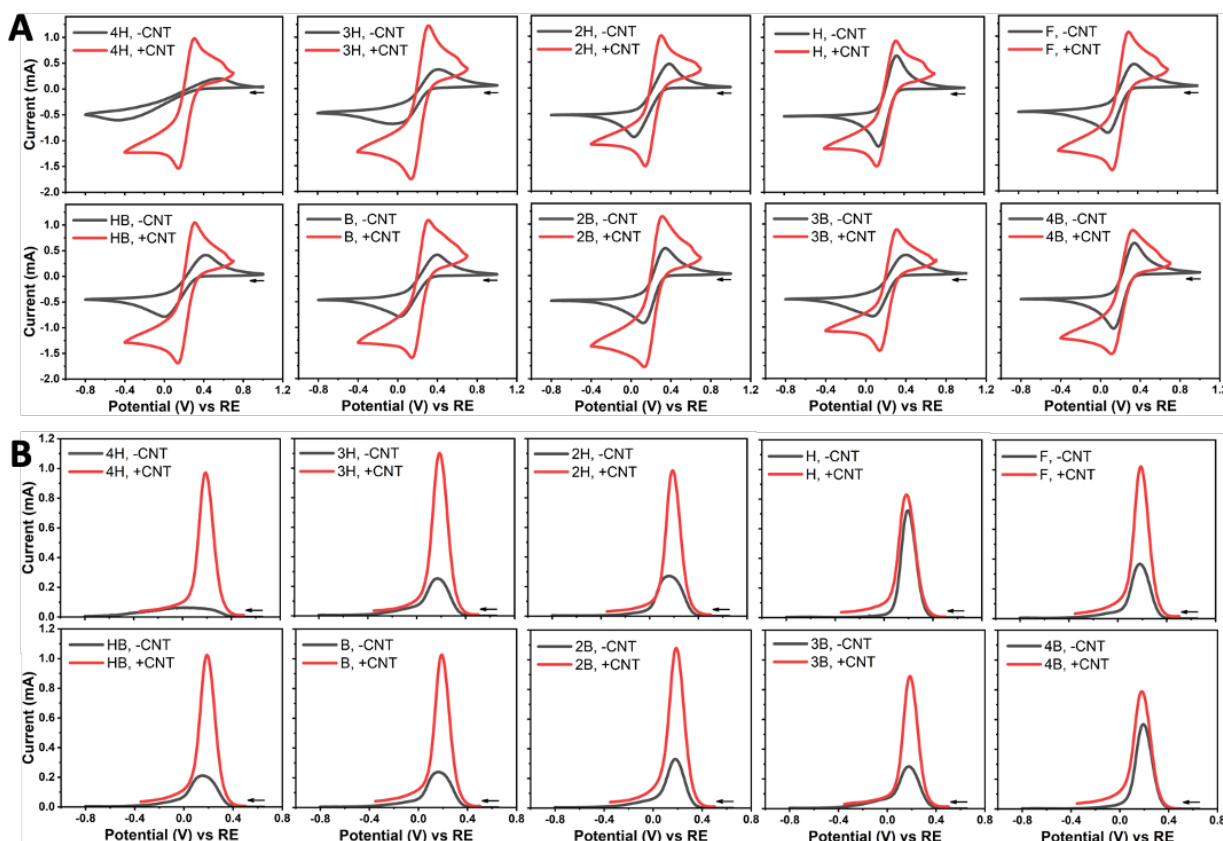

**Figure S1:** Cyclic (CVs, top two rows) and differential pulse (DPVs, bottom two rows) voltammograms of 100 mM ferricyanide at pencil lead electrodes (PLEs) that were made with 10 pencil leads of the same brand (Pentel AinSTEIN) and diameter (0.5 mm) but of 4H, 3H, 2H, H, F, HB, B, 2B, 3B and 4B hardness/softness grades. Black CVs and DPVs were recorded with PLEs that had no CNT modification while the red CVs and DPVs are responses of the CNT-modified PLE equivalents. The supporting electrolyte for the measurements was 100 mM KCl, the scan speed for CV acquisition was 50 mV/s and the pulse size and time for DPV recordings were 50 mV and 200 ms, respectively. The EC cell was arranged with a Pt counter and a Ag/AgCl/3M KCl reference electrode.

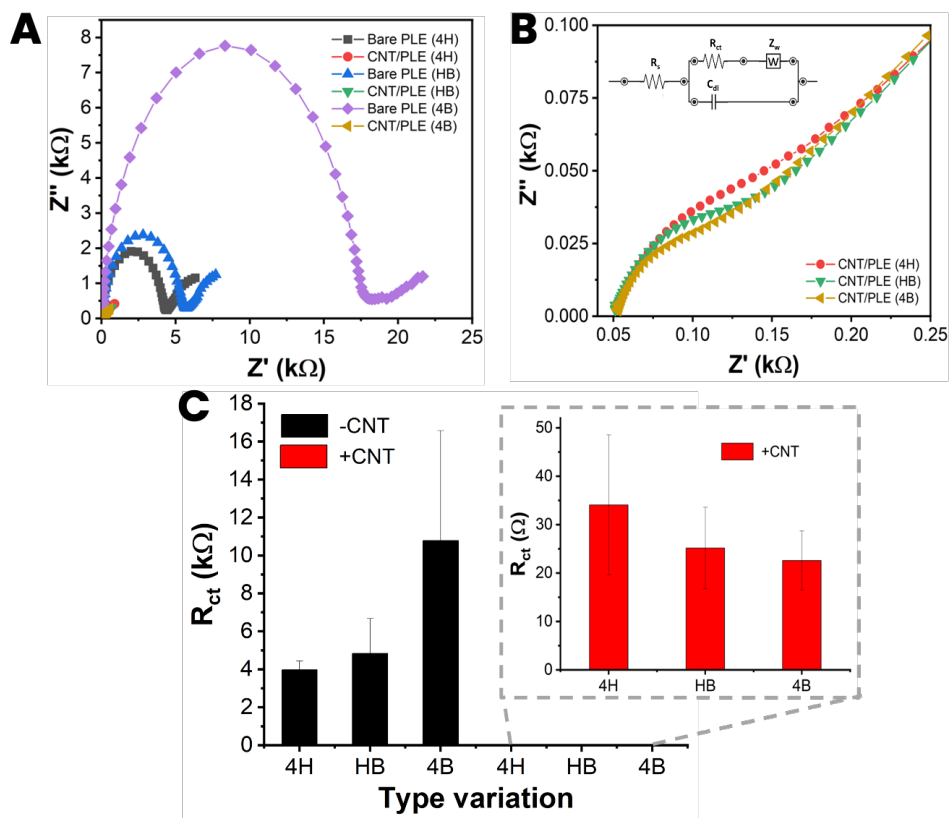

**Figure S2:** Electrochemical impedance spectroscopy characterization of a Pentel AinSTEIN-based pencil lead electrode regarding the influence of the pencil lead hardness on the bare and CNT-modified sensor's ferricyanide redox responsiveness. (A) Nyquist plots for PLEs that had a H (black square), HB (blue triangle) and 4B (purple square) PL incorporation but no CNT modification and the Nyquist plots for PLEs that H (red circle), HB (green triangle) and 4B (brown triangle) incorporation and a CNT modification. (B) A graphical zoom into the left bottom corner of the plot of the imaginary and real part of the electrode impedance in (A). (C) Bar chart representation of the charge transfer resistances,  $R_{ct}$ , of bare (black) and CNT-modified 4H-, HB and 4B-based PLEs. The EC cell was arranged as a three-electrode configuration system with a Pt counter-electrode, a Ag/AgCl/3 M KCl reference and the proposed PLE as working electrode. Conditions for the PL CNT modification: 10 repetitions of a sequence of 5-s-long immersion into a  $5 \text{ mg mL}^{-1}$  CNT suspension in DI water with 5-s-long periods of rest in air. Condition for EIS data acquisition: Frequency range was 100,000 - 0.01 Hz, the AC amplitude 10 mV, and the DC potential was set to open-circuit value of 270 mV. Electrolyte for EIS testing was a 0.1 M KCl solution containing a mixture of 5 mM  $\text{K}_4[\text{Fe}(\text{CN})_6]$  and  $\text{K}_3[\text{Fe}(\text{CN})_6]$ .  $R_{ct}$  value computation assumed for the working electrode the validity of the Randles equivalent circuit.

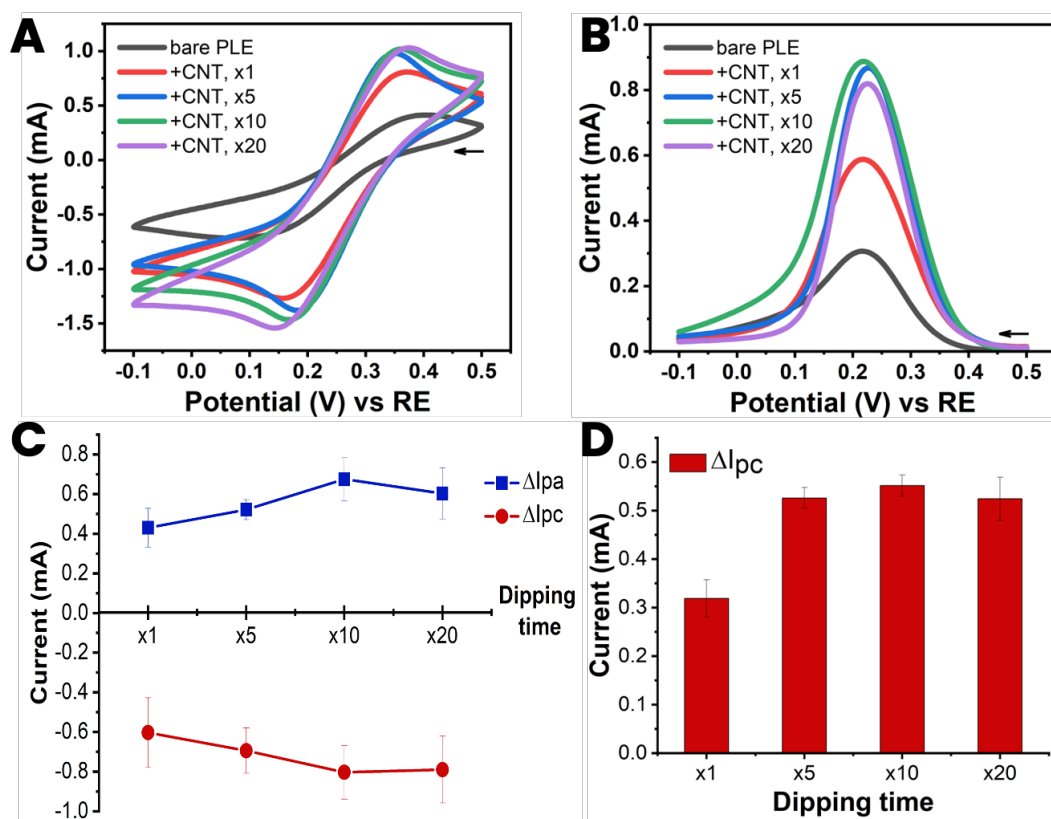

**Figure S3:** Evaluation of the influence of the number of dip/dry cycles that are performed during CNT modification of PLEs on the ferricyanide redox responsiveness of completed sensors. (A) Cyclic voltammograms (CVs) and (B) differential pulse (DPVs) voltammograms for the Pentel AinSTEIN HB PLEs that were unmodified (black line) or went through a 1 (red line), 5 (blue line), 10 (green line) and 20 (purple line) repeats of the sequence of 5-s-long immersion into a 5 mg/mL CNT suspension in DI water with 5-s-long periods of rest in air. (C) Plot of the gain in the CV ferricyanide reduction (red trace) and ferrocyanide oxidation (blue trace) currents, computed as  $\Delta I_p = I_p(\text{PLE}_{\text{CNT}}) - I_p(\text{PLE}_{\text{bare}})$ , as function of  $n$ , the number of dip and dry treatments. (D) Bar chart representation of the gain in the DPV ferricyanide reduction current, computed as  $\Delta I_{pc} = I_{pc}(\text{PLE}_{\text{CNT}}) - I_{pc}(\text{PLE}_{\text{bare}})$ , as function of  $n$ , the number of dip and dry treatments. The supporting electrolyte for the CV and DPV measurements was 100 mM KCl, the ferricyanide concentration was 100 mM, the scan speed for CV acquisition was 50 mV/s and the pulse size and time for DPV recordings were 50 mV and 200 ms, respectively. The EC cell was arranged with a Pt counter and a Ag/AgCl/3M KCl reference electrode.

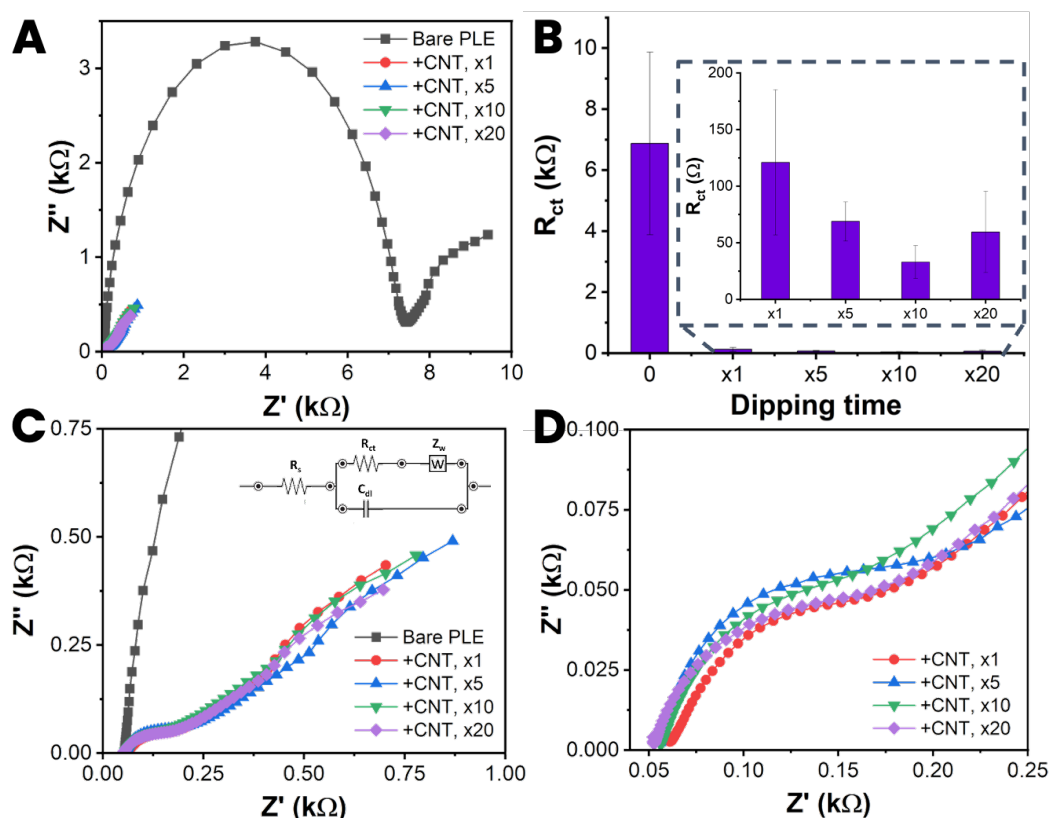

**Figure S4:** Electrochemical impedance spectroscopy (EIS) evaluation of the influence of the number of dip/dry cycles that are performed during CNT modification of PLEs on the ferricyanide redox responsiveness of completed sensors. (A) Nyquist plots of EIS data for the Pentel AiNSTEIN HB-PLEs that were unmodified (black squares) or went through a 1 (red squares), 5 (blue triangles), 10 (green triangles) and 20 (purple squares) repeats of the sequence of 5-s-long immersion into a 5 mg mL<sup>-1</sup> CNT suspension in DI water with 5-s-long periods of rest in air. (B) Bar chart representation of the charge transfer resistances,  $R_{ct}$ , computed for curve fits to the Randles equivalent circuit, as function of  $n$ , the number of dip and dry treatments. (C) and (D) are graphical zooms with increasing magnification into the left bottom corner of the plot of the imaginary and real part of the electrode impedance in (A). A three-electrode EC cell was used with a Pt counter and a Ag/AgCl/3M KCl reference electrode.

Conditions for the PL CNT modification: 10 repetitions of a sequence of 5-s-long immersion into a 5 mg mL<sup>-1</sup> CNT suspension in DI water and 5-s-long periods of rest in air.

Condition for EIS data acquisition: Frequency range was 100,000 - 0.01 Hz, the AC amplitude 10 mV, and the DC potential was set to open-circuit value of 270 mV. Electrolyte for EIS testing was a 0.1 M KCl solution containing a mixture of 5 mM K<sub>4</sub>[Fe(CN)<sub>6</sub>] and K<sub>3</sub>[Fe(CN)<sub>6</sub>].  $R_{ct}$  value computation assumed for the working electrode the validity of the Randles equivalent circuit.

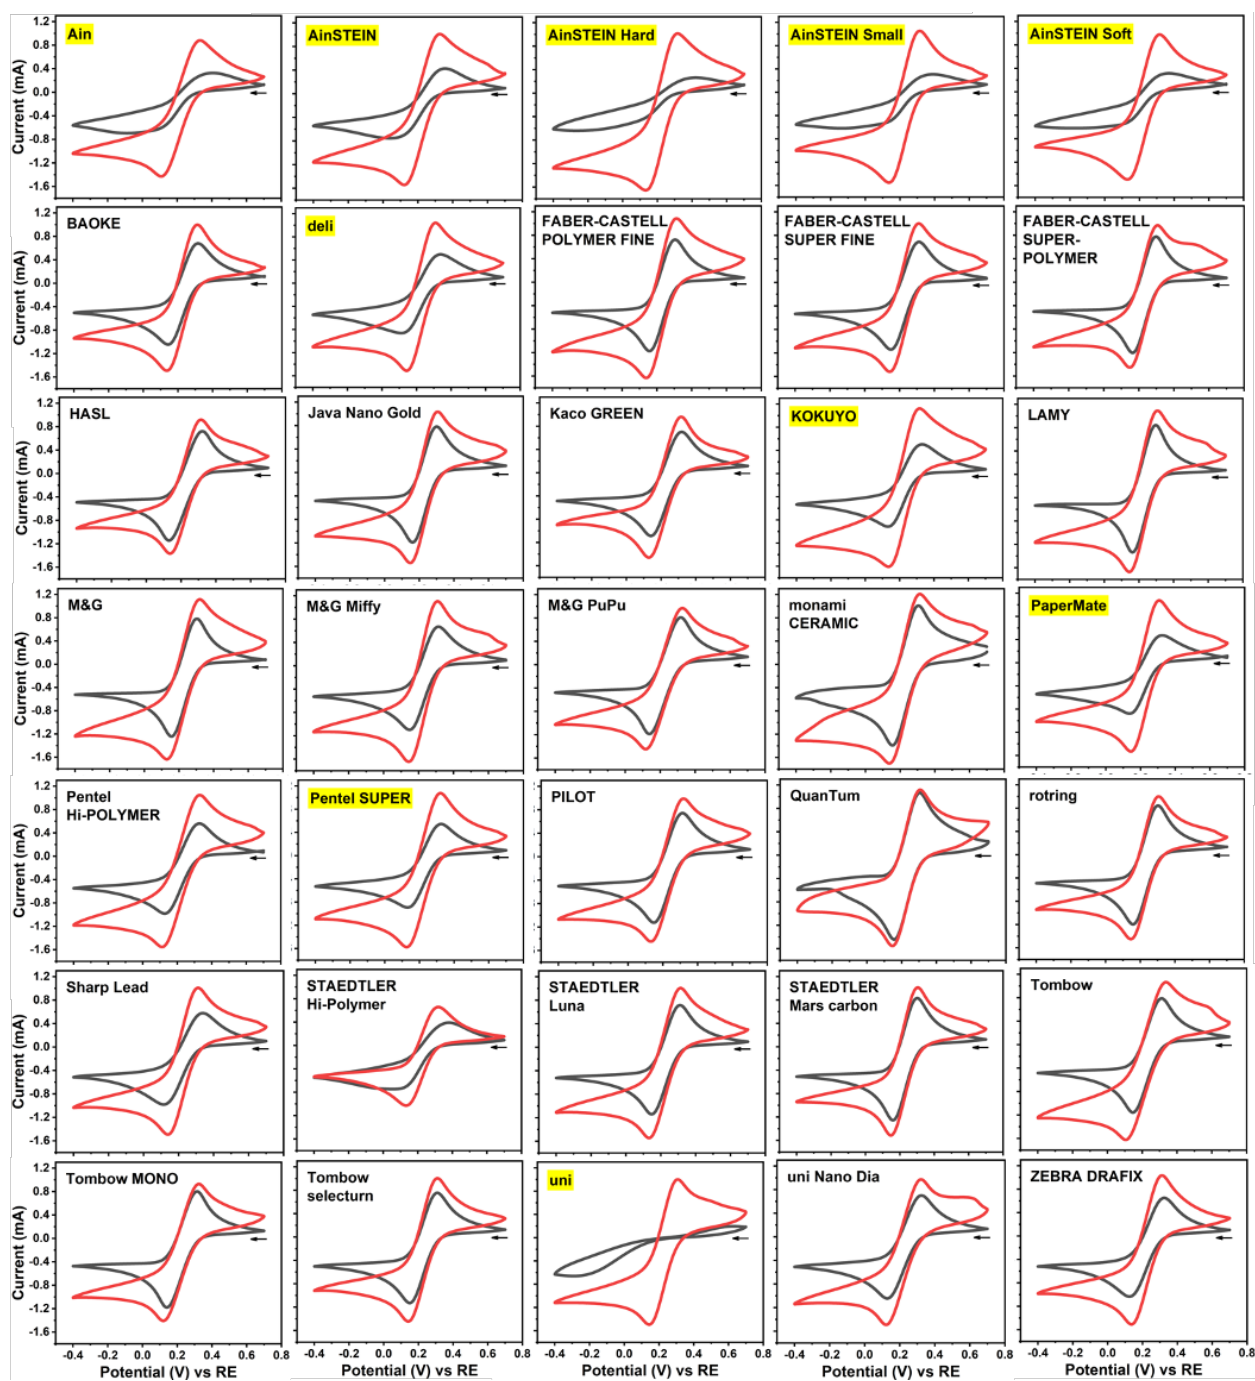

**Figure S5:** Cyclic voltammograms (CVs) of 100 mM ferricyanide at pencil lead electrodes (PLEs) that were made with 0.5-mm-diameter HB pencil leads of 35 different brands. Black CVs were recorded with PLEs that had no CNT modification while the red ones are the responses of the CNT-modified PLE equivalents. The supporting electrolyte for the measurements was 100 mM KCl, the scan speed for CV acquisition was 50 mV/s. The EC cell was arranged with a Pt counter and a Ag/AgCl/3M KCl reference electrode. The yellow marked PLE options have been further tested.



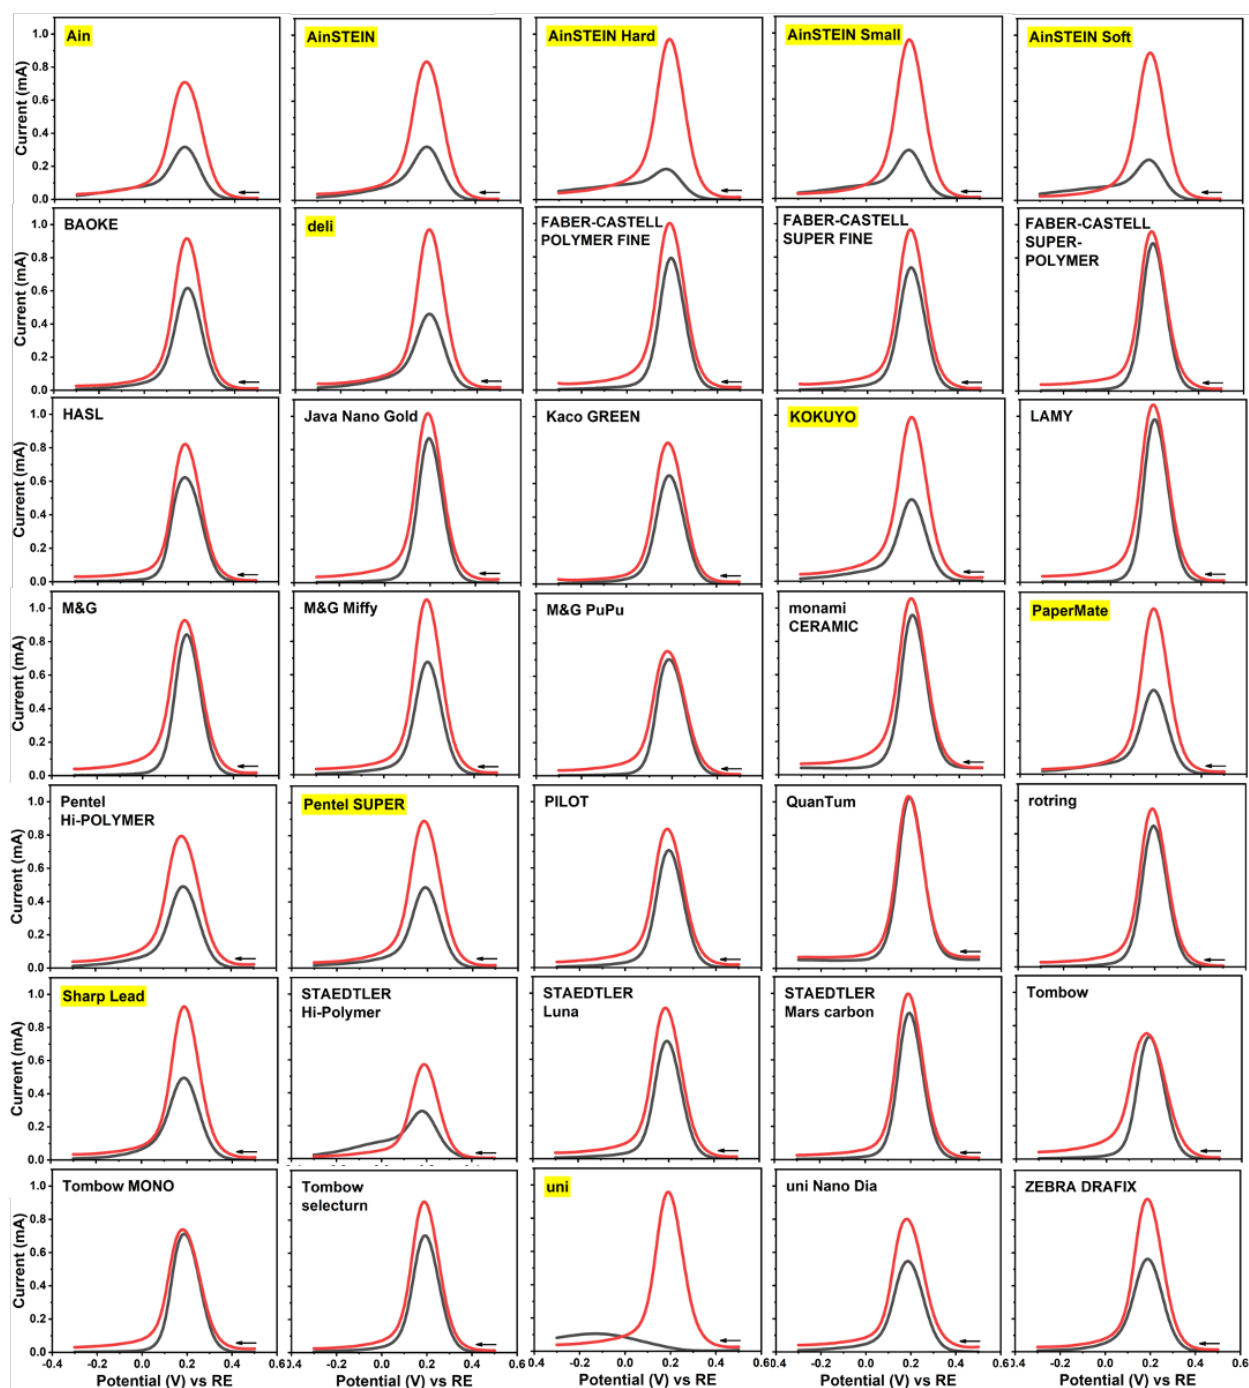

**Figure S6:** Differential pulse voltammograms (DPVs) of 100 mM ferricyanide at pencil lead electrodes (PLEs) that were made with 0.5-mm-diameter HB pencil leads of 35 different brands. Black CVs were recorded with PLEs that had no CNT modification while the red ones are the responses of the CNT-modified PLE equivalents. The supporting electrolyte for the measurements was 100 mM KCl and the pulse size and time for DPV recordings were 50 mV and 200 ms, respectively. The EC cell was arranged with a Pt counter and a Ag/AgCl/3M KCl reference electrode. The yellow marked PLE options have been further tested for reproducibility of the CNT modification (Figure S7 and S8).

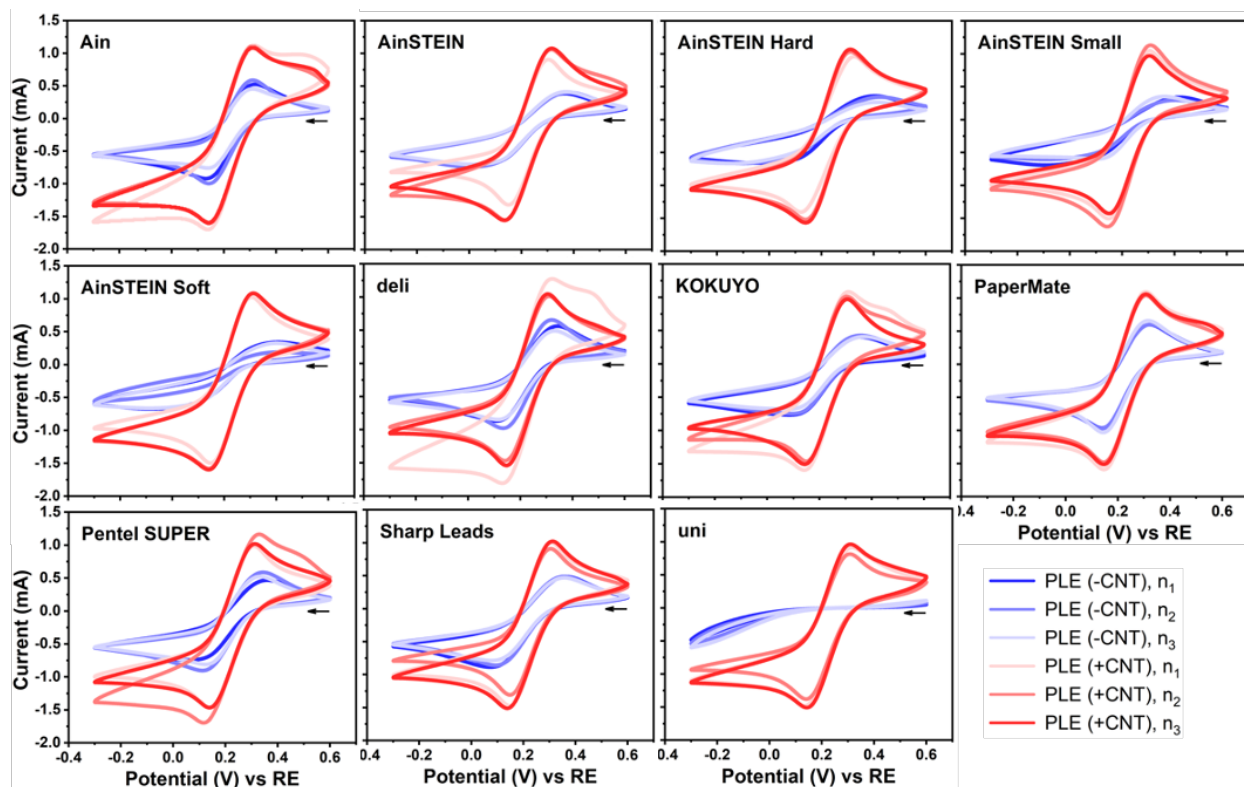

**Figure S7:** Triplicate repetitions of cyclic voltammograms of 100 mM ferricyanide at 11 different HB-PLEs without (blue) and with (red) CNT modification. The supporting electrolyte for the measurements was 100 mM KCl, the scan speed for CV acquisition was 50 mV/s. The EC cell was arranged with a Pt counter and a Ag/AgCl/3M KCl reference electrode.



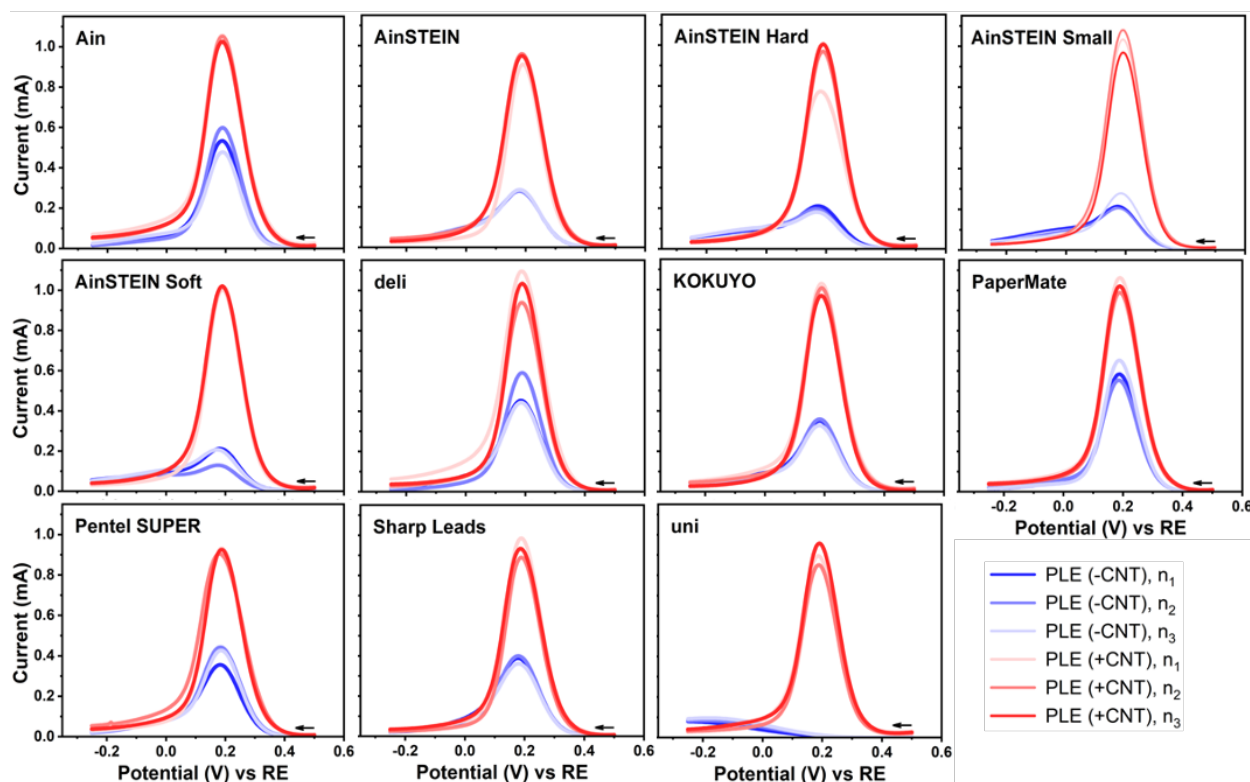

**Figure S8:** Triplicate repetitions of differential pulse voltammograms of 100 mM ferricyanide at 11 different HB-PLEs without (blue) and with (red) CNT modification. The supporting electrolyte for the measurements was 100 mM KCl, and the pulse size and time for DPV recordings were 50 mV and 200 ms, respectively. The EC cell was arranged with a Pt counter and a Ag/AgCl/3M KCl reference electrode.

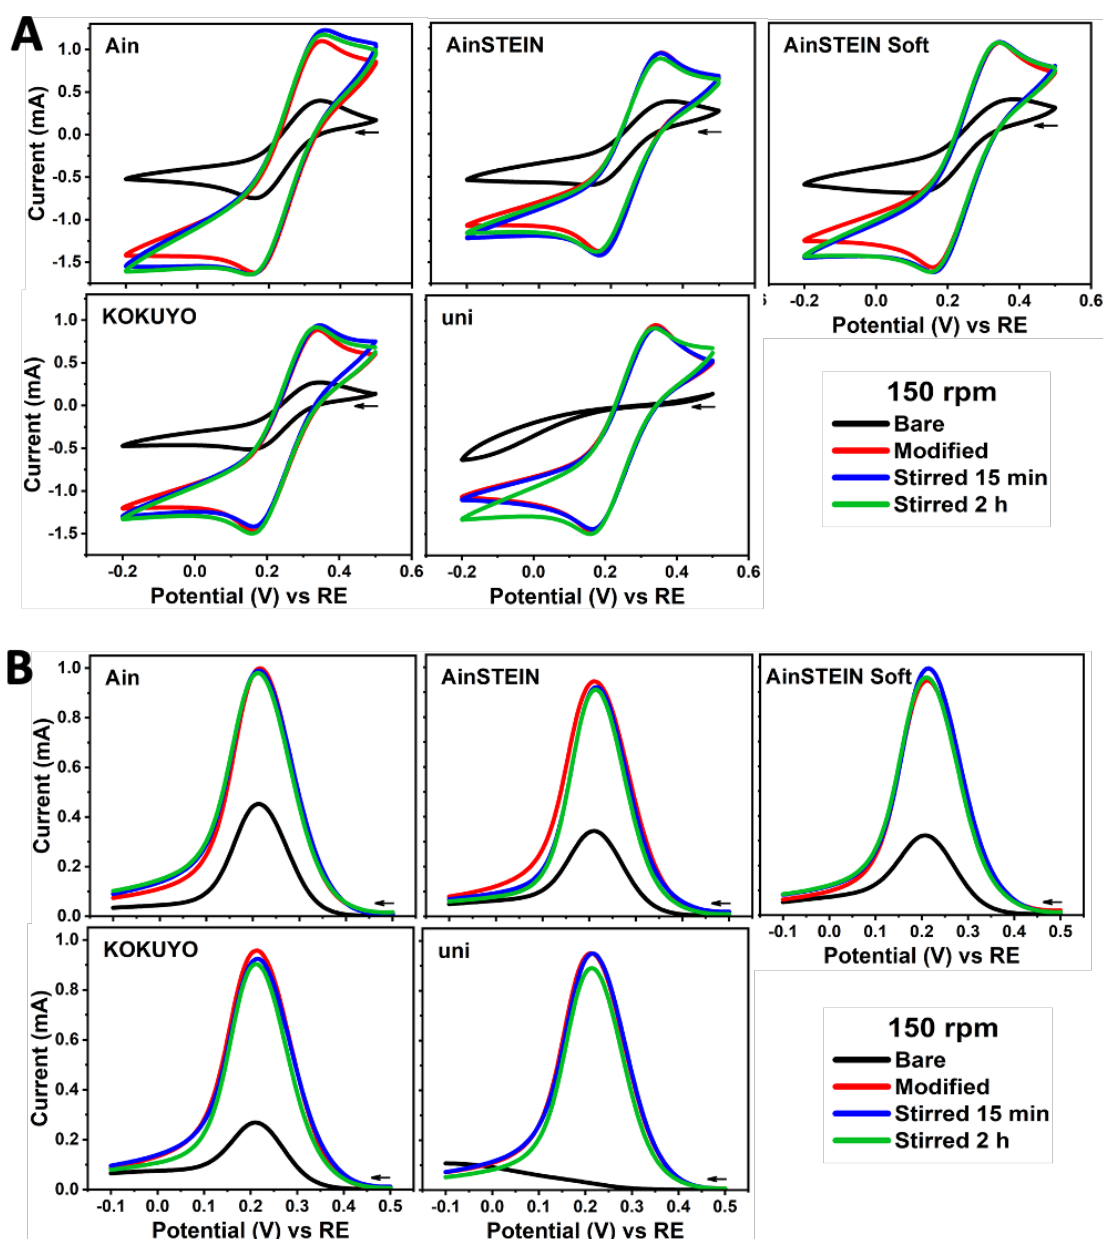

**Figure S9:** Durability test I with 5 CNT-modified HB pencil lead electrodes. The cyclic (A) and differential pulse (B) voltammograms (DPVs) of 100 mM ferricyanide that were obtained at HB-PLEs (PL brand: uni) without (black) and with (red) CNT modification. The (A) and (B) plot sets also include two voltammograms that were acquired after storage of the sensor tools in stirred DI water. Stirring rates were 150 rpm. Exposure times were 15 min (blue) or 2 hours (green). The supporting electrolyte for the measurements was 100 mM KCl. The EC cell was arranged with a Pt counter and a Ag/AgCl/3M KCl reference electrode. The scan speed for CV acquisition was 50 mV/s and the pulse size and time for DPV recordings were 50 mV and 200 ms, respectively.

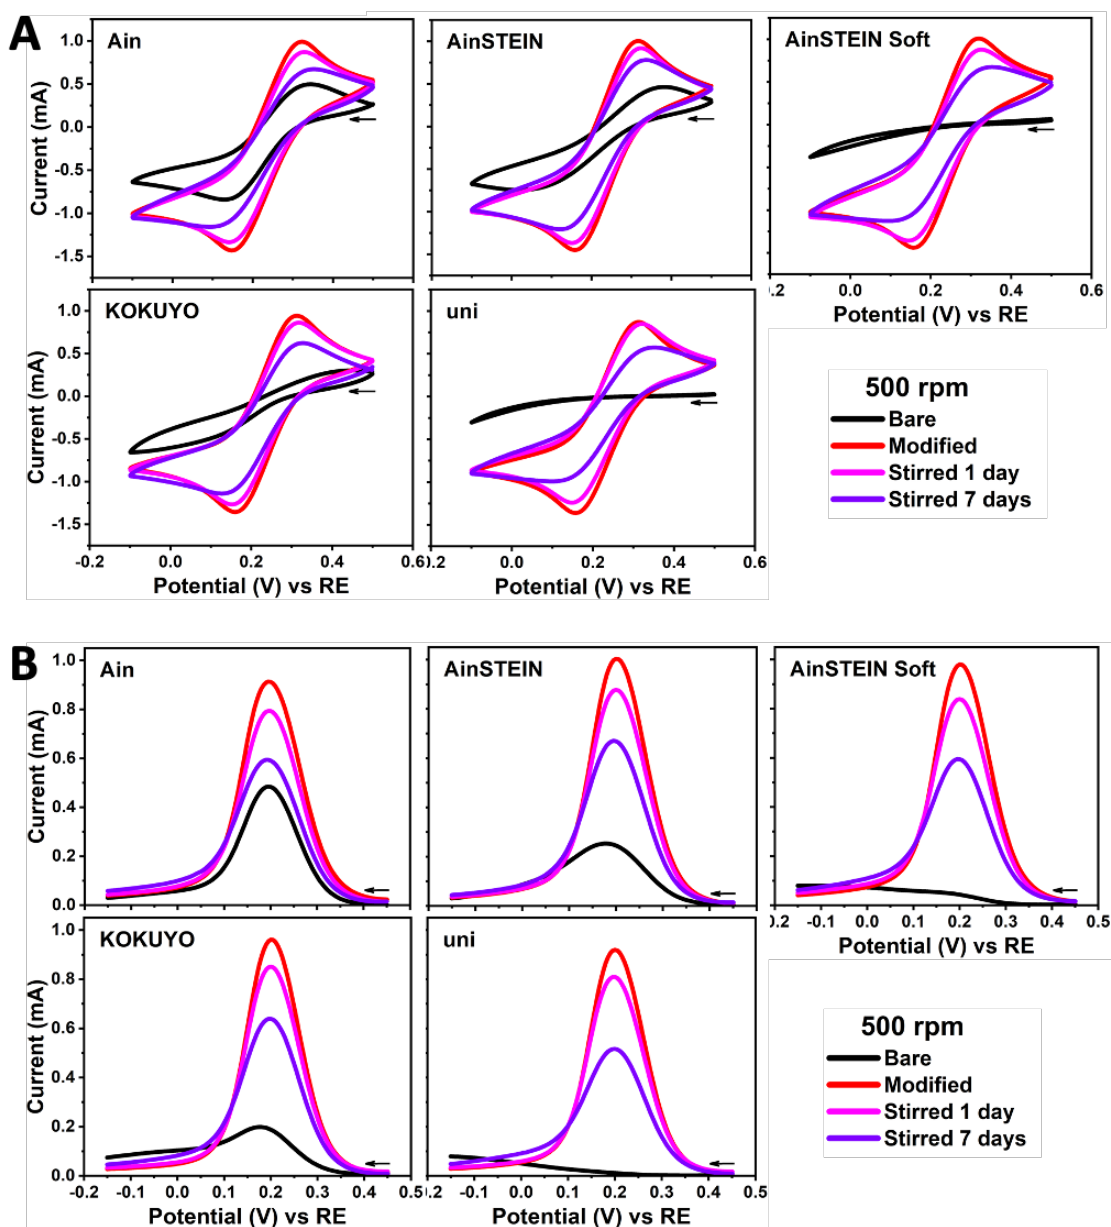

**Figure S10:** Durability test II with 5 CNT-modified HB pencil lead electrodes. The cyclic (A) and differential pulse (B) voltammograms (DPVs) of 100 mM ferricyanide that were obtained at HB-PLEs (PL brand: uni) without (black) and with (red) CNT modification. The (A) and (B) plot sets also include two voltammograms that were acquired after storage of the sensor tools in stirred DI water. Stirring rates were 500 rpm. Exposure times were 1 day (pink) or 7 days (purple). The supporting electrolyte for the measurements was 100 mM KCl. The EC cell was arranged with a coiled Pt counter and a Ag/AgCl/3M KCl reference electrode. The scan speed for CV acquisition was 50 mV/s and the pulse size and time for DPV recordings were 50 mV and 200 ms, respectively.

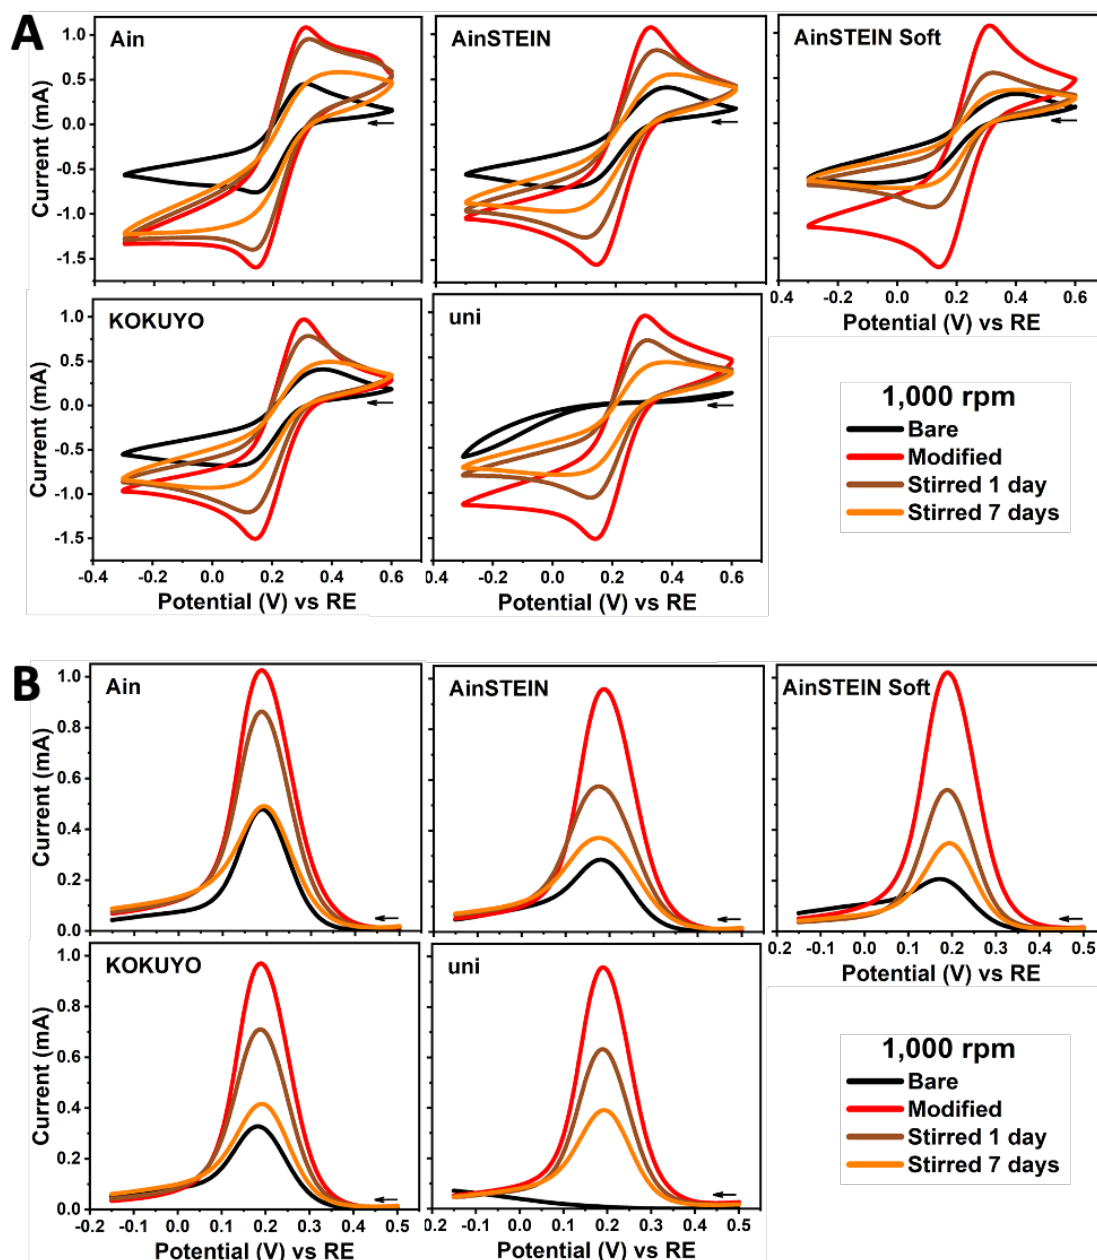

**Figure S11:** Durability test III with 5 CNT-modified HB pencil lead electrodes. The cyclic (A) and differential pulse (B) voltammograms (DPVs) of 100 mM ferricyanide that were obtained at HB-PLEs (PL brand: uni) without (black) and with (red) CNT modification. The (A) and (B) plot sets also include two voltammograms that were acquired after storage of the sensor tools in stirred DI water. Stirring rates were 1000 rpm. Exposure times were 1 day (brown) or 7 days (orange). The supporting electrolyte for the measurements was 100 mM KCl. The EC cell was arranged with a Pt counter and a Ag/AgCl/3M KCl reference electrode. The scan speed for CV acquisition was 50 mV/s and the pulse size and time for DPV recordings were 50 mV and 200 ms, respectively.

**Table S1:** The specific conductivity of Pentel AinSTEIN pencil leads of different hardness/softness grades (4H → HB → 4B).

| No. | Type | Ø (mm) | L (cm) | R <sub>m</sub> (Ω) | R (Ω cm <sup>-1</sup> ) | G = 1/R (S cm <sup>-1</sup> ) |
|-----|------|--------|--------|--------------------|-------------------------|-------------------------------|
| 1   | 4H   | 0.5    | 6      | 1.3                | 0.2                     | 4.6                           |
| 2   | 3H   |        |        | 1.3                | 0.2                     | 4.6                           |
| 3   | 2H   |        |        | 1.2                | 0.2                     | 5.0                           |
| 4   | H    |        |        | 1.4                | 0.2                     | 4.3                           |
| 5   | F    |        |        | 1.3                | 0.2                     | 4.6                           |
| 6   | HB   |        |        | 1.2                | 0.2                     | 5.0                           |
| 7   | B    |        |        | 1.2                | 0.2                     | 5.0                           |
| 8   | 2B   |        |        | 1.8                | 0.3                     | 3.3                           |
| 9   | 3B   |        |        | 1.3                | 0.2                     | 4.6                           |
| 10  | 4B   |        |        | 2.0                | 0.3                     | 3.0                           |

**Abbreviations:** R<sub>m</sub> = Measured resistance in Ohm (Ω), R = Resistivity in Ω cm<sup>-1</sup>  
 G = Conductivity in Siemens per cm (S cm<sup>-1</sup>)  
 L = PL length between multimeter grip points in cm,  
 Ø = PL diameter in millimeter (mm)

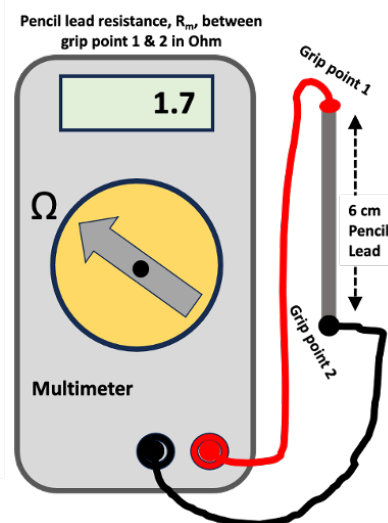

**Table S2:** Carbon nanotube-based performance enhancement of stationary pencil lead electrodes (PLEs): A comparison of own with published accomplishments.

|    | PLE Geometry             | CNT Type  | CNT Preparation                                  | CNT Modification | Add-on Matrix Component | x fold R <sub>ct</sub> decrease | x fold I <sub>pc</sub> increase | Ref.      |
|----|--------------------------|-----------|--------------------------------------------------|------------------|-------------------------|---------------------------------|---------------------------------|-----------|
| 1  | Disk                     | MW-CNT    | Suspension in H <sub>2</sub> O                   | Drop & Dry       | None                    | 18                              | 4                               | 1         |
| 2  | Disk                     | SW-CNT    | Suspension in DMSO, DMF, THF or H <sub>2</sub> O | Drop & Dry       | None                    | 7                               | 1.4                             | 2         |
| 3  | Disk                     | MW-CNT    | Suspension in DMF                                | Drop & Dry       | None                    | 11,584                          | -                               | 3         |
| 4  | Disk                     | c-MW-CNT  | Suspension in DMF                                | Drop & Dry       | None                    | 2                               | 2                               | 4         |
| 5  | Cylindrical              | MW-CNT    | Suspension in Chitosan/Acetic Acid               | ED               | Bi-NP/NiO-NP/NaM-NP     | 75                              | 1.6                             | 5         |
| 6  | Cylindrical              | MW-CNT    | Suspension in Phosphate Buffer Solution          | ED               | PoPD                    | 1.4                             | 2                               | 6         |
| 7  | Cylindrical              | MW-CNT    | Suspension in Chitosan/NaM/Acetic Acid           | Dip & Dry        | NiO/NaM-NP              | 12.5                            | 1.5                             | 7         |
| 8  | Cylindrical              | c-MW-CNT  | Suspension in DMG                                | ED/Dip & Dry     | oo-PEDOT                | 32.6                            | 1.6                             | 8         |
| 9  | Cylindrical              | MW-CNT    | Suspension in Chitosan/Acetic Acid/SEP           | Dip & Dry        | SEP                     | 16.4                            | 3                               | 9         |
| 10 | Cylindrical              | MW-CNT    | Suspension in Chitosan/Acetic Acid/SMT           | Dip & Dry        | SMT                     | 6.5                             | 2.5                             | 10        |
| 11 | Cylindrical              | c-MW-CNT  | Suspension in                                    | Dip & Dry/ED     | Au-NP/MIP               | 2                               | 1.6                             | 11        |
| 12 | Cylindrical              | c-MW-CNT  | Suspension in DMF                                | Dip & Dry        | None                    | 2                               | 1                               | 12        |
| 13 | Cylindrical <sup>1</sup> | c-SW-CNTs | Suspension in H <sub>2</sub> O                   | Dip and Dry      | None                    | 192                             | 2.2                             | This work |
|    | Cylindrical <sup>2</sup> | c-SW-CNTs | Suspension in H <sub>2</sub> O                   | Dip and Dry      | None                    | 812                             | 2.1                             |           |

**Abbreviations:** PLE = Pencil lead electrode, CNT = Carbon nanotube, R<sub>ct</sub> = Charge transfer resistance, I<sub>pc</sub> = Cathodic cyclic voltammetry current, ED = Electrodeposition, c = carboxylated, DMF = Dimethyl-formamide, DMSO = Dimethyl-sulfoxide, THF, Bi-NP = Bi nanoparticles, NiO-NP = Nickel oxide nanoparticles, NaM-NP = Sodium montmorillonite nanoparticles, PoPD = Poly(o-phenylenediamine), oo-PEDOT = Over-oxidized poly(3,4-ethylenedioxythiophene), SEP = Sepiolite clay, SMT = Sodium smectite, Au-NP = Gold nanoparticles, MIP = Molecular imprinted polymer, THF = Tetrahydrofuran

**Notes:** 1. The pencil lead was a Pentel AinSTEIN, 2. The pencil lead was a Kokuyo, 3. Cyclic voltammetry used the [Fe(CN)<sub>6</sub>]<sup>3-</sup> anion as redox species, 4. Electrochemical impedance spectroscopy used a [Fe(CN)<sub>6</sub>]<sup>3-/4-</sup> mixture as redox species.

## References:

- (1) Manjunatha, P.; Arthoba Nayaka, Y.; Chethana, B. K.; Vidyasagar, C. C.; Yathisha, R. O. Development of multi-walled carbon nanotubes modified pencil graphite electrode for the electrochemical investigation of aceclofenac present in pharmaceutical and biological samples. *Sensing and Bio-Sensing Research* **2018**, *17*, 7-17.
- (2) Ahammad, A. S.; Akter, T.; Al Mamun, A.; Islam, T.; Hasan, M. M.; Mamun, M.; Faraezi, S.; Monira, F.; Saha, J. K. Cost-effective electrochemical sensor based on carbon nanotube modified-pencil electrode for the simultaneous determination of hydroquinone and catechol. *Journal of The Electrochemical Society* **2018**, *165* (9), B390.
- (3) Fard, G. P.; Alipour, E.; Sabzi, R. E. A. Modification of a disposable pencil graphite electrode with multiwalled carbon nanotubes: application to electrochemical determination of diclofenac sodium in some pharmaceutical and biological samples. *Analytical Methods* **2016**, *8* (19), 3966-3974.

- (4) Gong, Z. Q.; Sujari, A. N. A.; Ab Ghani, S. Electrochemical fabrication, characterization and application of carboxylic multi-walled carbon nanotube modified composite pencil graphite electrodes. *Electrochimica Acta* **2012**, *65*, 257-265.
- (5) Yıldız, C.; Eskiköy Bayraktepe, D.; Yazan, Z.; Önal, M. Bismuth nanoparticles decorated on Na-montmorillonite-multiwall carbon nanotube for simultaneous determination of heavy metal ions- electrochemical methods. *Journal of Electroanalytical Chemistry* **2022**, *910*, 116205.
- (6) Kuralay, F.; Bayramlı, Y. Electrochemical Determination of Mitomycin C and Its Interaction with Double-Stranded DNA Using a Poly(o-phenylenediamine)-Multi-Walled Carbon Nanotube Modified Pencil Graphite Electrode. *Analytical Letters* **2021**, *54* (8), 1295-1308.
- (7) Fitoz, A.; Yazan, Z.; Önal, M. Simultaneous Trace Electrochemical Determination of Xanthine Theophylline and Theobromine with a Novel Sensor Based on a Composite Including Metal Oxide Nanoparticle Multi-walled Carbon Nanotube and Nano-Na-montmorillonite Clay. *Electroanalysis* **2021**, *33* (10), 2226-2234.
- (8) Gorduk, O. Differential Pulse Voltammetric Determination of Serotonin Using an Acid-Activated Multiwalled Carbon Nanotube – Over-Oxidized Poly(3,4-ethylenedioxythiophene) Modified Pencil Graphite Electrode. *Analytical Letters* **2020**, *53* (7), 1034-1052.
- (9) Eskiköy Bayraktepe, D.; Yazan, Z. Application of single-use electrode based on nano-clay and MWCNT for simultaneous determination of acetaminophen, ascorbic acid and acetylsalicylic acid in pharmaceutical dosage. *Electroanalysis* **2020**, *32* (6), 1263-1272.
- (10) Bayraktepe, D. E.; Yazan, Z.; Önal, M. Sensitive and cost effective disposable composite electrode based on graphite, nano-smectite and multiwall carbon nanotubes for the simultaneous trace level detection of ascorbic acid and acetylsalicylic acid in pharmaceuticals. *Talanta* **2019**, *203*, 131-139.
- (11) Rezaei, B.; Esfahani, M. H.; Ensafi, A. A. Modified Au Nanoparticles/Imprinted Sol-Gel/Multiwall Carbon Nanotubes Pencil Graphite Electrode as a Selective Electrochemical Sensor for Papaverine Determination. *IEEE Sensors Journal* **2016**, *16* (19), 7037-7044.
- (12) Karakaya, S.; Dilgin, Y. The application of multi-walled carbon nanotubes modified pencil graphite electrode for voltammetric determination of favipiravir used in COVID-19 treatment. *Monatshefte für Chemie - Chemical Monthly* **2023**, *154* (7), 729-739.
